# Supplementary material for: Preclinical Characterization of BET Family Bromodomain Inhibitor ABBV-075 Suggests Combination Therapeutic Strategies
Source: Oxford University Press journal article supplement (doi:10.1158/0008-5472.can-16-1793), 2017-04-17
Supplement: 00085472can161793-sup-168446_2_unknown_upload_3932114_wnwqff.xlsx [file 00085472can161793-sup-168446_2_unknown_upload_3932114_wnwqff.xlsx]

## Sheet: Supl Table 4
Degrees of apoptosis triggered by MS417 across cancer cell lines
Tumor Type	Cell Line	% Apoptosis	Classification
AML	MOLM-13	5	Hematological
AML	ML-2	12	Hematological
AML	SHI-1	31	Hematological
AML	MOMO-1	36	Hematological
AML	Kasumi-1	37	Hematological
AML	OCI-AML-5	40	Hematological
AML	HL60	55	Hematological
AML	THP1	65	Hematological
AML	OCI-AML-2	70	Hematological
AML	MV-4-11	72	Hematological
AML/MDS	SKM1	77	Hematological
ALL	RS4:11	14	Hematological
MM	KMSS11	25	Hematological
MM	RPMI-8226	28	Hematological
MM	SKMM2	35	Hematological
MM	AMO-1	37	Hematological
MM	L363	43	Hematological
MM	Karpas620	46	Hematological
MM	NCI-H929	51	Hematological
MM	JJN3	51	Hematological
MM	OPM-2	70	Hematological
NHL	U2973	1	Hematological
NHL	OCI-Ly7	15	Hematological
NHL	OCI-Ly2	20	Hematological
NHL	WSU NHL	36	Hematological
NHL	ULA	37	Hematological
Breast	MCF7	0	solid
Colon	LoVo	0	solid
HCC	HepG2	0	solid
Liver	Caki	0	solid
Neuroblastoma	SK-N-SH	0	solid
Colon	HCT-15	3.9	solid
Colon	DLD-1	4	solid
NSCLC	H1373	4	solid
Pancreatic	BxPC3FP5	4	solid
Brain Tumor	Daoy	4.84	solid
Cervical	C33A	5	solid
Head & Neck	FaDu	5	solid
Bladder	253JB.V	6	solid
Head & Neck	CAL27	9	solid
Prostate	DU145	9	solid
NSCLC	H1563	11	solid
Pancreatic	PANC1	12.16	solid
Breast	MDAMB458	13	solid
Cervical	ME180	13	solid
Cervical	Siha	13	solid
Melanoma	C32	13	solid
Melanoma	CHL-1	13	solid
NSCLC	H23	14	solid
Prostate	PC3-M	15	solid
Prostate	22RV1	16	solid
NSCLC	H441	17	solid
Cervical	HeLa	18.13	solid
Bladder	HT1376	19	solid
Glioma	D54MG	19	solid
Ovarian	HeyA8	19	solid
Breast	HCC38	20	solid
Liver	HuH7	21.04	solid
Ovarian	PA1	22	solid
Pancreatic	MiaPaCa	46.47	solid
Neuroblastoma	IMR32	57	solid
Neuroblastoma	SKNDZ	62.95	solid
